# Supplementary material for: Estimation of non-null SNP effect size distributions enables the detection of enriched genes underlying complex traits
Source: PLOS journal article supplement (doi:10.1371/journal.pgen.1008855), 2020-06-15
Supplement: S1 (10.1371/journal.pgen.1008855.s001) [file journal.pgen.1008855.s001]

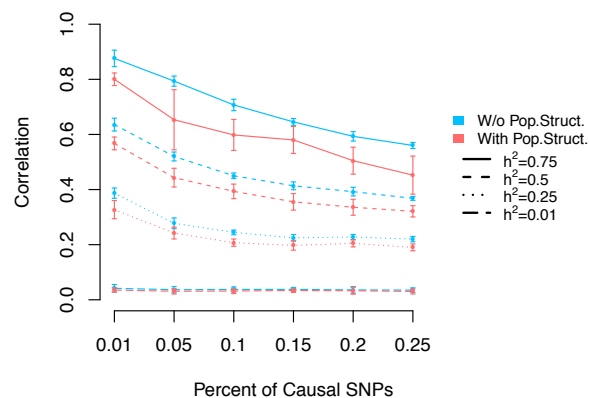

(A) LASSO ( $\alpha = 0$ )

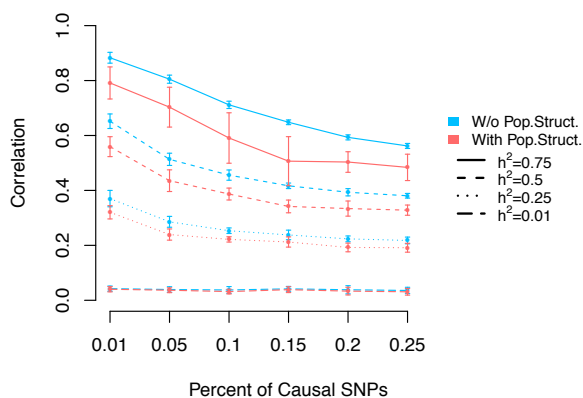

(B) Elastic Net ( $\alpha = 0.5$ )

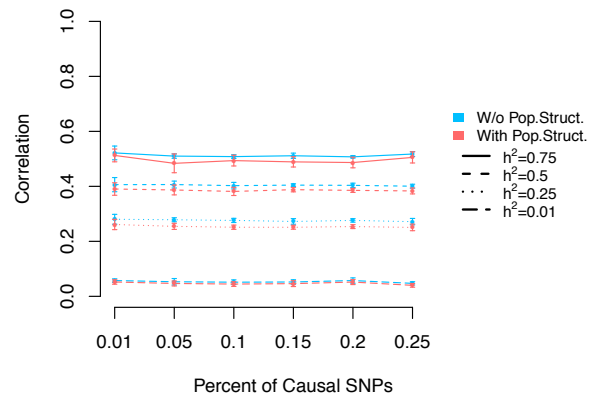

(C) Ridge Regression ( $\alpha = 1$ )

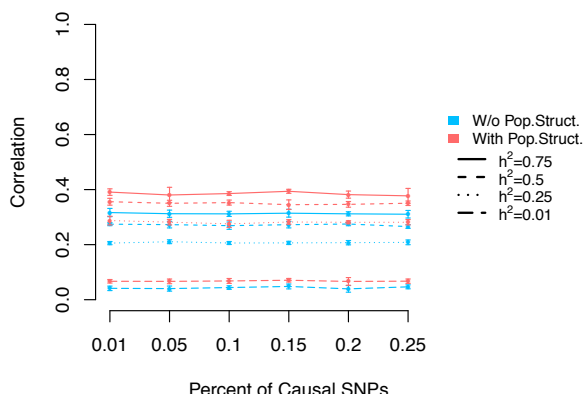

(D) No Regularization
