# Supplementary material for: Estimation of non-null SNP effect size distributions enables the detection of enriched genes underlying complex traits
Source: PLOS journal article supplement (doi:10.1371/journal.pgen.1008855), 2020-06-15
Supplement: S23 (10.1371/journal.pgen.1008855.s023) [file journal.pgen.1008855.s023]

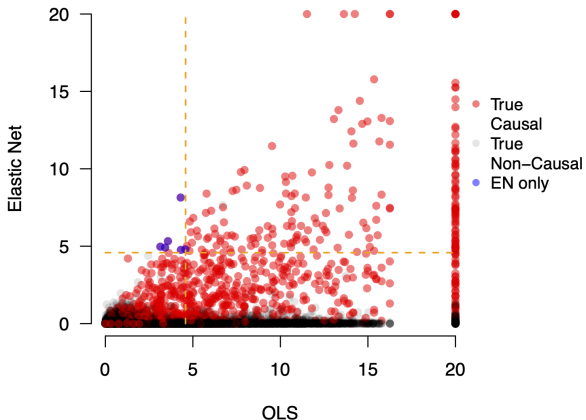

(A)  $N = 5,000$  with 1% Enriched Genes

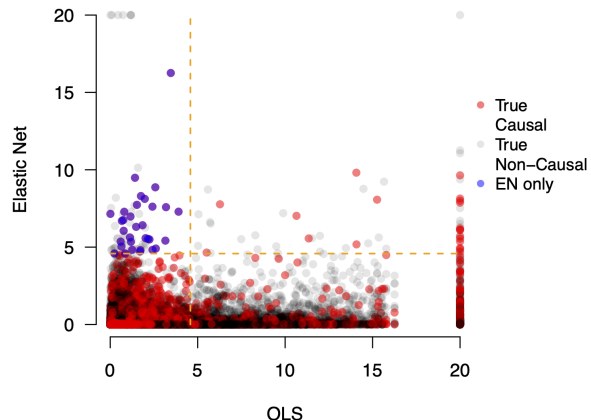

(B)  $N = 5,000$  with 10% Enriched Genes

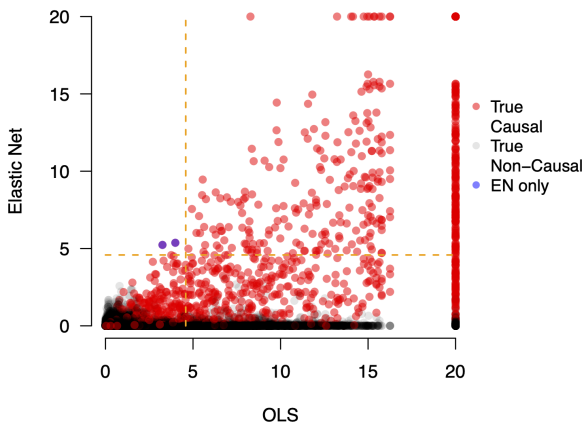

(C)  $N = 10,000$  with 1% Enriched Genes

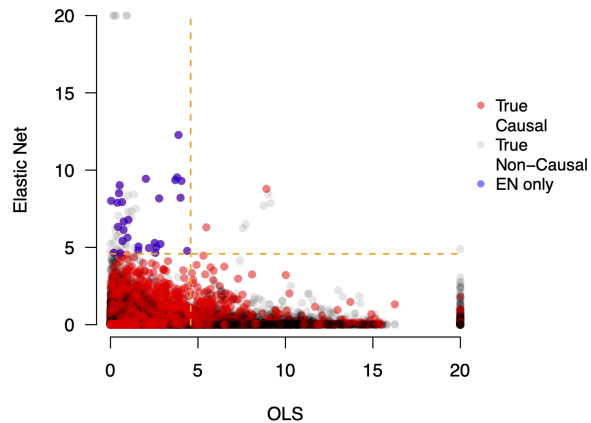

(D)  $N = 10,000$  with 10% Enriched Genes
