# Supplementary material for: Estimation of non-null SNP effect size distributions enables the detection of enriched genes underlying complex traits
Source: PLOS journal article supplement (doi:10.1371/journal.pgen.1008855), 2020-06-15
Supplement: S37 (10.1371/journal.pgen.1008855.s037) [file journal.pgen.1008855.s037]

|              |        | <i>gene-<math>\epsilon</math> Approaches</i> |                      |                      |               |
|--------------|--------|----------------------------------------------|----------------------|----------------------|---------------|
| Causal Genes | Metric | OLS                                          | RR                   | EN                   | LASSO         |
| 1%           | Power  | 0.798 (0.100)                                | 0.712 (0.111)        | 0.793 (0.108)        | 0.774 (0.118) |
|              | FDR    | 0.789 (0.077)                                | 0.345 (0.119)        | <b>0.077 (0.083)</b> | 0.101 (0.100) |
| 10%          | Power  | 0.168 (0.125)                                | 0.211 (0.031)        | 0.261 (0.062)        | 0.261 (0.061) |
|              | FDR    | 0.490 (0.144)                                | <b>0.011 (0.019)</b> | 0.021 (0.026)        | 0.027 (0.029) |

|              |        | <i>Other Methods</i> |               |               |               |                      |
|--------------|--------|----------------------|---------------|---------------|---------------|----------------------|
| Causal Genes | Metric | PEGASUS              | VEGAS         | RSS           | SKAT          | MAGMA                |
| 1%           | Power  | 0.809 (0.104)        | 0.869 (0.090) | 0.773 (0.113) | 0.744 (0.123) | <b>0.870 (0.089)</b> |
|              | FDR    | 0.833 (0.046)        | 0.832 (0.047) | 0.301 (0.098) | 0.806 (0.059) | 0.848 (0.040)        |
| 10%          | Power  | 0.426 (0.044)        | 0.420 (0.042) | 0.251 (0.030) | 0.342 (0.038) | <b>0.488 (0.048)</b> |
|              | FDR    | 0.449 (0.068)        | 0.470 (0.067) | 0.134 (0.044) | 0.429 (0.075) | 0.474 (0.064)        |
