# Supplementary material for: Estimation of non-null SNP effect size distributions enables the detection of enriched genes underlying complex traits
Source: PLOS journal article supplement (doi:10.1371/journal.pgen.1008855), 2020-06-15
Supplement: S40 (10.1371/journal.pgen.1008855.s040) [file journal.pgen.1008855.s040]

|                     |               | <i>gene-<math>\epsilon</math> Approaches</i> |                      |                      |                      |
|---------------------|---------------|----------------------------------------------|----------------------|----------------------|----------------------|
| <b>Causal Genes</b> | <b>Metric</b> | <b>OLS</b>                                   | <b>RR</b>            | <b>EN</b>            | <b>LASSO</b>         |
| 1%                  | Power         | 0.707 (0.111)                                | 0.567 (0.107)        | 0.624 (0.115)        | 0.638 (0.123)        |
|                     | FDR           | 0.591 (0.132)                                | 0.260 (0.161)        | <b>0.004 (0.022)</b> | 0.006 (0.030)        |
| 10%                 | Power         | 0.101 (0.030)                                | <b>0.172 (0.060)</b> | 0.013 (0.012)        | 0.010 (0.007)        |
|                     | FDR           | 0.119 (0.101)                                | 0.365 (0.160)        | 0.060 (0.192)        | <b>0.056 (0.183)</b> |

|                     |               | <i>Other Methods</i> |                      |               |               |               |
|---------------------|---------------|----------------------|----------------------|---------------|---------------|---------------|
| <b>Causal Genes</b> | <b>Metric</b> | <b>PEGASUS</b>       | <b>VEGAS</b>         | <b>RSS</b>    | <b>SKAT</b>   | <b>MAGMA</b>  |
| 1%                  | Power         | 0.719 (0.108)        | <b>0.787 (0.106)</b> | 0.744 (0.107) | 0.636 (0.114) | 0.753 (0.109) |
|                     | FDR           | 0.605 (0.127)        | 0.626 (0.116)        | 0.116 (0.126) | 0.575 (0.142) | 0.677 (0.108) |
| 10%                 | Power         | 0.117 (0.019)        | 0.065 (0.015)        | 0.054 (0.012) | 0.093 (0.016) | 0.118 (0.017) |
|                     | FDR           | 0.132 (0.101)        | 0.226 (0.154)        | 0.091 (0.128) | 0.116 (0.106) | 0.162 (0.106) |
