# Supplementary material for: Estimation of non-null SNP effect size distributions enables the detection of enriched genes underlying complex traits
Source: PLOS journal article supplement (doi:10.1371/journal.pgen.1008855), 2020-06-15
Supplement: S42 (10.1371/journal.pgen.1008855.s042) [file journal.pgen.1008855.s042]

|              |        | <i>gene-<math>\epsilon</math> Approaches</i> |                      |                      |               |
|--------------|--------|----------------------------------------------|----------------------|----------------------|---------------|
| Causal Genes | Metric | OLS                                          | RR                   | EN                   | LASSO         |
| 1%           | Power  | 0.431 (0.117)                                | 0.427 (0.137)        | 0.155 (0.073)        | 0.158 (0.073) |
|              | FDR    | 0.838 (0.128)                                | 0.577 (0.286)        | <b>0.004 (0.035)</b> | 0.014 (0.081) |
| 10%          | Power  | 0.026 (0.089)                                | <b>0.079 (0.030)</b> | 0.027 (0.035)        | 0.009 (0.021) |
|              | FDR    | 0.903 (0.091)                                | <b>0.571 (0.125)</b> | 0.624 (0.392)        | 0.705 (0.430) |

|              |        | <i>Other Methods</i> |                      |               |               |               |
|--------------|--------|----------------------|----------------------|---------------|---------------|---------------|
| Causal Genes | Metric | PEGASUS              | VEGAS                | RSS           | SKAT          | MAGMA         |
| 1%           | Power  | 0.463 (0.116)        | <b>0.556 (0.117)</b> | 0.520 (0.110) | 0.387 (0.110) | 0.500 (0.110) |
|              | FDR    | 0.847 (0.115)        | 0.828 (0.114)        | 0.608 (0.133) | 0.858 (0.115) | 0.846 (0.105) |
| 10%          | Power  | 0.027 (0.013)        | 0.016 (0.011)        | 0.006 (0.006) | 0.022 (0.012) | 0.020 (0.011) |
|              | FDR    | 0.868 (0.094)        | 0.921 (0.081)        | 0.898 (0.103) | 0.886 (0.091) | 0.896 (0.091) |
