# Supplementary material for: Estimation of non-null SNP effect size distributions enables the detection of enriched genes underlying complex traits
Source: PLOS journal article supplement (doi:10.1371/journal.pgen.1008855), 2020-06-15
Supplement: S54 (10.1371/journal.pgen.1008855.s054) [file journal.pgen.1008855.s054]

| gene- $\varepsilon$ Approach | Trait  | # Mix. Comp. | % Associated SNPs | % Causal SNPs | $\varepsilon$ -genic Threshold ( $\sigma_2^2$ ) |
|------------------------------|--------|--------------|-------------------|---------------|-------------------------------------------------|
| Elastic Net                  | Height | 7            | 11.65%            | 1.27%         | $1.90 \times 10^{-5}$                           |
|                              | BMI    | 6            | 16.61%            | 7.60%         | $2.73 \times 10^{-5}$                           |
|                              | MCV    | 8            | 11.60%            | 0.21%         | $3.48 \times 10^{-5}$                           |
|                              | MPV    | 8            | 5.47%             | 0.20%         | $3.37 \times 10^{-5}$                           |
|                              | PLC    | 7            | 10.33%            | 0.39%         | $3.68 \times 10^{-5}$                           |
|                              | WHR    | 8            | 14.38%            | 7.20%         | $3.67 \times 10^{-5}$                           |
| LASSO                        | Height | 8            | 10.66%            | 0.67%         | $2.29 \times 10^{-5}$                           |
|                              | BMI    | 6            | 16.57%            | 7.35%         | $2.71 \times 10^{-5}$                           |
|                              | MCV    | 7            | 9.94%             | 0.23%         | $3.56 \times 10^{-5}$                           |
|                              | MPV    | 9            | 4.51%             | 0.20%         | $3.32 \times 10^{-5}$                           |
|                              | PLC    | 8            | 8.57%             | 0.26%         | $3.80 \times 10^{-4}$                           |
|                              | WHR    | 6            | 15.27%            | 7.05%         | $3.29 \times 10^{-4}$                           |
| Ridge Regression             | Height | 5            | 47.73%            | 13.93%        | $5.67 \times 10^{-7}$                           |
|                              | BMI    | 5            | 38.53%            | 17.98%        | $1.49 \times 10^{-7}$                           |
|                              | MCV    | 5            | 45.28%            | 9.79%         | $8.76 \times 10^{-6}$                           |
|                              | MPV    | 9            | 34.42%            | 2.69%         | $1.13 \times 10^{-7}$                           |
|                              | PLC    | 5            | 46.14%            | 8.59%         | $8.71 \times 10^{-6}$                           |
|                              | WHR    | 5            | 42.09%            | 19.12%        | $1.31 \times 10^{-7}$                           |
| OLS                          | Height | 5            | 49.08%            | 6.36%         | $3.08 \times 10^{-5}$                           |
|                              | BMI    | 3            | 54.54%            | 25.25%        | $3.31 \times 10^{-5}$                           |
|                              | MCV    | 9            | 34.39%            | 1.96%         | $5.55 \times 10^{-5}$                           |
|                              | MPV    | 9            | 36.07%            | 2.16%         | $6.74 \times 10^{-5}$                           |
|                              | PLC    | 9            | 36.95%            | 1.84%         | $6.28 \times 10^{-5}$                           |
|                              | WHR    | 3            | 50.03%            | 23.81%        | $3.49 \times 10^{-5}$                           |
